# Supplementary material for: Recent mobility of plastid encoded group II introns and twintrons in five strains of the unicellular red alga Porphyridium
Source: PeerJ journal article supplement (doi:10.7717/peerj.1017), 2015-06-18

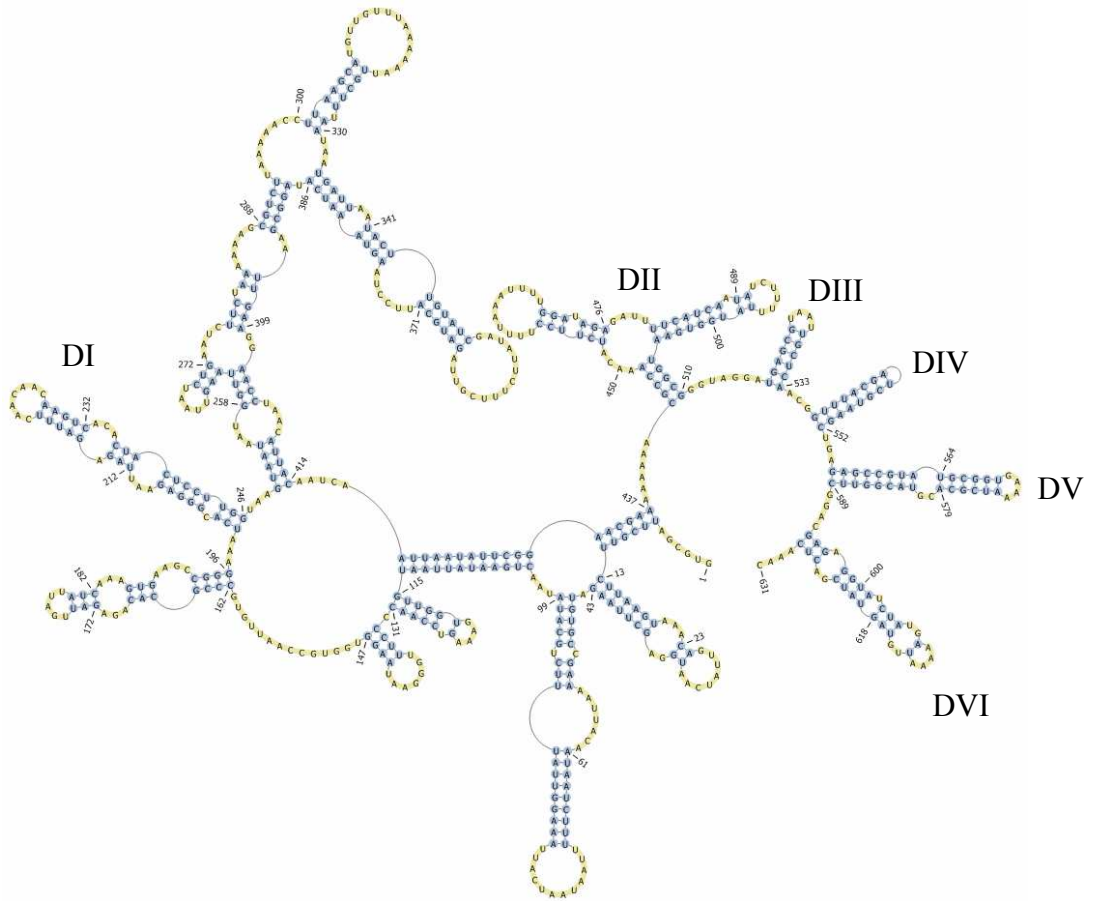

Supplement: Figure_S19.pdf [file Figure_S19.pdf]
