# Supplementary material for: Recent mobility of plastid encoded group II introns and twintrons in five strains of the unicellular red alga Porphyridium
Source: PubMed Central journal article supplement (PMC4476101; doi:10.7717/peerj.1017), 2015-06-18
Supplement: peerj-03-1017-s003.pdf [file peerj-03-1017-s003.pdf]

matlb MKQNTLEKIFDDWDSINWQKITQVYFSTQKEIWDASINNEKKLRLKIQTEAFNSWSEKLLAVKYVTKKFIQTLAGKYRTYIP 85  
matla --MTTHQA--EKWKNPWTQFQRKHKLQYKYAAKENDESLKKWQLINLENSSRYLSVKQVTEFD SKNAGNGQSRIS 82  
matlc -MQPT-LKSGVEDWETLPWKQFRKQVFRLLQHRHYKAQQENYKLVHKLQRLLFNSRAAKFLALRQVTLQHTGKVTAGIEGASKLN 83  
matle -MQPT-SKSYVEDWESLPWKQFQKQVFRLLQHRHYKAQQENYKLVHKLQRLLFNSRAAKFLALRQVTLQHTGKVTAGIDGINKLN 83  
matld -MQPT-LKSCVEDWKNLPWKQFQKQVFRLLQHRHYKAQQGNVYKLVHKLQRLLFSSRAAKFLALRQVTLQHTGKVTAGIDGINKLN 83  
matlf -MQPT-LKSCVEDWKA LPWKQFQKQVFRLLQHRHYKAQQGNVYKLVHKLQRLLFSSRAATFLALRQVTLQHTGKVTAGIDGAKLN 83  
matlg -MQPT-LKSCVEDWKA LPWKQFQKQVFRLLQHRHYKAQQGNVYKLVHKLQRLLFSSRAAKFLALRQVTLQHTGKVTAGIDGAKLN 83  
matlh -MQPT-LKSCVEDWKA LPWKQFQKQVFRLLQHRHYKAQQGNVYKLVHKLQRLLFSSRAAKFLALRQVTLQHTGKVTAGIDGAKLN 83  
matli -MQPT-LKSCVEDWKA LPWKQFQKQVFRLLQHRHYKAQQGNVYKLVHKLQRLLFNSRAAKFLALRQVTLQHTGKVTAGIDGAKLN 83

matlb NQYKIEFAKKL--EKKKSFNLSNLY--DYNQYNPI--IIOQSAQLVYKLIIEPEWTAKMEDYVYNDKLA-SQGNINDLVYV 161  
matla AIDKILSSEIKNLSIAEYESLRDLITVKNGNKELLSVPMKDRALCELIKYALEPEYESYASSGSYAFRVGRNPWDIQKTIYD 167  
matlc KREIFELFKELNNGYKHSPLKRVFIPQSNGEKRPLEPTIKDKALQCLINYLLEPEYAYASKGSLGFRPTRSKWDITQKNIFT 168  
matle EKERFELFERIKSKKFKHQPLKRVFIPKSNGEKRPLEPTIKDKALQCLINYLLEPEYAYASKGSRGFRPGRSTWDVQKNIF 168  
matld EKERFGLDELNTLNKYKHSPLRRVFLPKNGEKRPLEPTIKDRSQQCLVYKLSLEPEYAYASKGSRGFRPGRSAWDVQMNIF 168  
matlf EKERFEMFNSLKDNNKYKHSPLRRVFLPKNGEKRPLEPTIKDRITQCLVYKLSLEPEYAYASKGSRGFRPGRSTWDVQSNIQN 168  
matlg EKERLEMFNSLKGNNKYKHSPLRRVFLPKNGEKRPLEPTIKDRITVQCLVYKLSLEPEYAYASKGSRGFRPGRSTWDVQKNIFI 168  
matlh EKERLNFDSIKNLKYKHSPLRRVFLPKNGEKRPLEPTIKDRITVQCLVYKLSLEPEYAYASKGSRGFRPGRSTWDVQKNIFI 168  
matli EKERLEMFNSLKDNNKYKHSPLRRVFLPKNGEKRPLEPTIKDRITVQCLVYKLSLEPEYAYASKGSRGFRPGRSTWDVQKNIFY 168

matlb LCLLINSKSKRYVHGYISKINTKLNLDYFNNTHGYSGNVSKQLNSWNAACFTPNQLFTKQFPKQKSSIIIGDLFDLHIGLE 246  
matla -SFKVLEINSHKRIKIDITKCLSEAHYNEELREVFIPQEAKSFLLSGKAGIFNDYLRNSDLSLYQ--DRIAPILANLLNGIE 249  
matlc -NLSGHTNSNKRILKIGIEKCFEKINHEKILSLKLPKILKIRLSALKAGVLRKRAITQERTPKG--GVVSPILCNIALHGLE 250  
matle -NLSHHTNPKKLELDVKKCFDKDHDKLLSLHLPITIKRIRLSALRAGVLSKRFPTSEGT PQG--GIISPLCNIALHGLE 250  
matld -NLKRHSTNYKRILEDIEKCFDKDHDKLLSLHLPITIQMOKIKSALKAGVLRKRAITQERTPKG--GIISPLCNIALHGLE 250  
matlf -NLGRRDNYKRILEDIEKCFDKRINHDKLLSLHLPITIQMOKIKSALKAGVLRKRAITQERTPKG--GIISPLCNIALHGLE 250  
matlg -NLGQRKTNYKRILEDIEKCFDKRINHDKLLSLHLPITIQMOKIKSALKAGVLRKRAITQERTPKG--GIISPLCNIALHGLE 250  
matlh -NLKLNHTNYKRILEDIEKCFDKRINHDKLLSLHLPITIQMOKIKSALKAGVLRKRAITQERTPKG--GIISPLCNIALHGLE 250  
matli -NLKRHTNYKRILEDIEKCFDKRINHDKLLSLHLPITIQMOKIKSALKAGVLRKRAITQERTPKG--GIISPLCNIALHGLE 250

matlb --W--DLYRKYNYEYKCSLITKTYENCPEFKITRSDQIILVDDIQNLFKYTKTVNNFIAKANGLTHDSEMASLEKGFDFLG 327  
matla DIW--NSYNSHGLGEEKS--YAS--KSNRKKQGRFRGNKAFVITESHEDPEDLNQLFQFLFKGNPNYLEFNLPVIVSGDFDLG 328  
matlc DIW--NQPARYFCCKKKKEWVIR--KSEIIRQRIRYDDMFIIDNQENSNELLSKINDFLAERGNLTKETQTLVKSTEGFNFLG 331  
matle DILNNTPARSFCNTHSRYLYK--KADIIQRGRYADDMMFFIDGYEDANELLKKMDDFLERGLRVKEAKTHLVKLSGDFDLG 333  
matld DLW--NQFQRRWSKNNKYVSD--KRQIVQRGRYADDMMFFIEHEEDANELRKKDLFLAERGNVYKESKTHLVKSTEGDFDLG 331  
matlf DLW--NQPERQWQNKNNKYVYK--KSWMRQRGRYADDMMFFIEHEEDANELRKKDLFLAERGNVYKESKTHLVKLSGDFDLG 331  
matlg DIW--NKPKRYMDKRYNKRFY--KNRIQRGRYADDMMFFIEHEEDAMELRRKDSFTERGNVYKESKTHLVKSTEGDFDLG 331  
matlh DLW--NQPIRYWNSRQTFENM--KNTKVQRGRYADDMMFFIEHEEDANELRKKDLFLAERGNVYKESKTHLVKSTEGDFDLG 331  
matli DIW--NKPVIRWNSKKNYEFER--RTMIVQRGRYADDMMFFIEHEEDANVELRKKDLFLAERGNVYKESKTHLVKSTEGDFDLG 331

matlb FYIRQRYGYD---KISILPSKSKQMEHNLRLKLRGVIYHEYEGKVRATTNKSIDEVINEMNPIINWCLLYYKDFIHTEILRSLDW 407  
matla WHFKYKAKNN---KFCYCPKSTSCVYTKATIKNLM---RNSRYKLEDRLAMVKIIEYKWFVYNQYCDMKQVKTRLW 398  
matlc WQFEVKA---VITCWPSSKNNRRQMGKIKTMM---KDSRFTLDQRNKKVIRGWRKYHQYCDLSKVN--LW 398  
matle WRFEVKA---VLTFCFPTKNNRRMLDKKTAM---RDARFTLEERLKKVKVIYRGWRNYHQYCDLSKVN--VW 400  
matld WRFEVKE---KLTWCWPSRKNRRQMDTKATM---RNORFTLEERLKKVKVIYRGWNNYHQYCDLTKIN--LW 398  
matlf WRFEVKA---ALTCWPSRKNRRQMSNRAM---KDAFTLEERLKNKVIYRGWNNYHQYCDLTKIN--LW 398  
matlg WRFEVKA---ALTSWPSRKNRRMLDKKTIM---KDAFTLEERLKKVKVIYRGWRNYHQYCDLTKID--LW 398  
matlh WRFEVKA---ALTCWPSHKNRRQMDKETM---KDAFTLEERLKKVKVIYRGWNNYHQYCDLSKIN--LW 398  
matli WRFEVKA---ALTCWPSRKNRRQMDKIKTMM---KDAFTLEERLKKVKVIYRGWNNYHQYCDLSKIN--LW 398

matlb KISNTLYKWEKKKYSWN---TIAKWKR--NCQVIFNGKQRIL---GTSFNSVLELHSDFKPCYKQLPYGNVYVECKNLSR 481  
matla YLSKWTYKYGKKQSKQKQKETRASAKEKLSKVKDFNGHKYQ---INGYIPNNLKYYPYND--- 459  
matlc SIDSWTYKYVKKLNNKLNKHDRATAIKRIKIDTIFNDHKYPTL--- 443  
matle SINDWTYKYAKKLNKLNKRDRAIKIKRIKTQDITGHKLS---PFGYAAVKSDKSLSDNDWLYWSKCK--- 468  
matld SINDWTYNYAKKLNKLNKRDRAIKIKRIKTQDIFRGTWS---LFRYVAKSDKSPFDNDWLYWSKRKHKQYWGQLAKV 478  
matlf SINDWTYNYVKKLNSKLNKRDRAIKIKRIDAKDFNGHNS---LVFNATKSAKSPFDNDWLYWSKRKHKQYWGPFPAVL 478  
matlg SINEWTYQYVKKLNSKLNKRDRAIKIKRIKTQDIFNGHKFS---LVFGHAAKSEKSPFDNDWLYWSKRKHKQYWGQLAKV 478  
matlh SIDSWTYKYVKKLNSKLNKRDRAIKIKRVTQDIFSSHKWS---LFRYVAKSEKSPFDNDWLYWSKRKHKQYWGQLAKV 478  
matli SINDWTYKYVKKLNSKLNKRDRAIKIKRIKTQDIFNNHKWS---LFRYVAKSDKSPFDNDWLYWSKRKHKQYWGQLAKV 478

matlb EQN--- 484  
matla --- 459  
matlc --- 443  
matle --- 468  
matld TSQKFKC---GACNLKFAVDDHVEHHIDGNHKNNKYKNLEAHRSSCHQYKPIHGKRRKATA 538  
matlf TLQKFKC---NACNLKFAVDDHVEHHIDGNHKNNKYKNLEAHRSSCHHYKPIHGKRRKATA 538  
matlg TLQKFKC---NACNLKFAVDDHVEHHIDGNHKNNKYKNLEAHRSSCHHYKPIHGKRRKATA 538  
matlh TLQNFKC---NACNLKFTVDDHVEFHHIDGNHKNNKYKNLEAHRSSCHHYKPIHGKRRKATA 538  
matli TLQKFKC---NACNLKFAVDDHVEHHIDGNHKNNKYKNLEAHRSSCHHYKPIHGKRRKATA 538
