# Supplementary material for: Recent mobility of plastid encoded group II introns and twintrons in five strains of the unicellular red alga Porphyridium
Source: PubMed Central journal article supplement (PMC4476101; doi:10.7717/peerj.1017), 2015-06-18

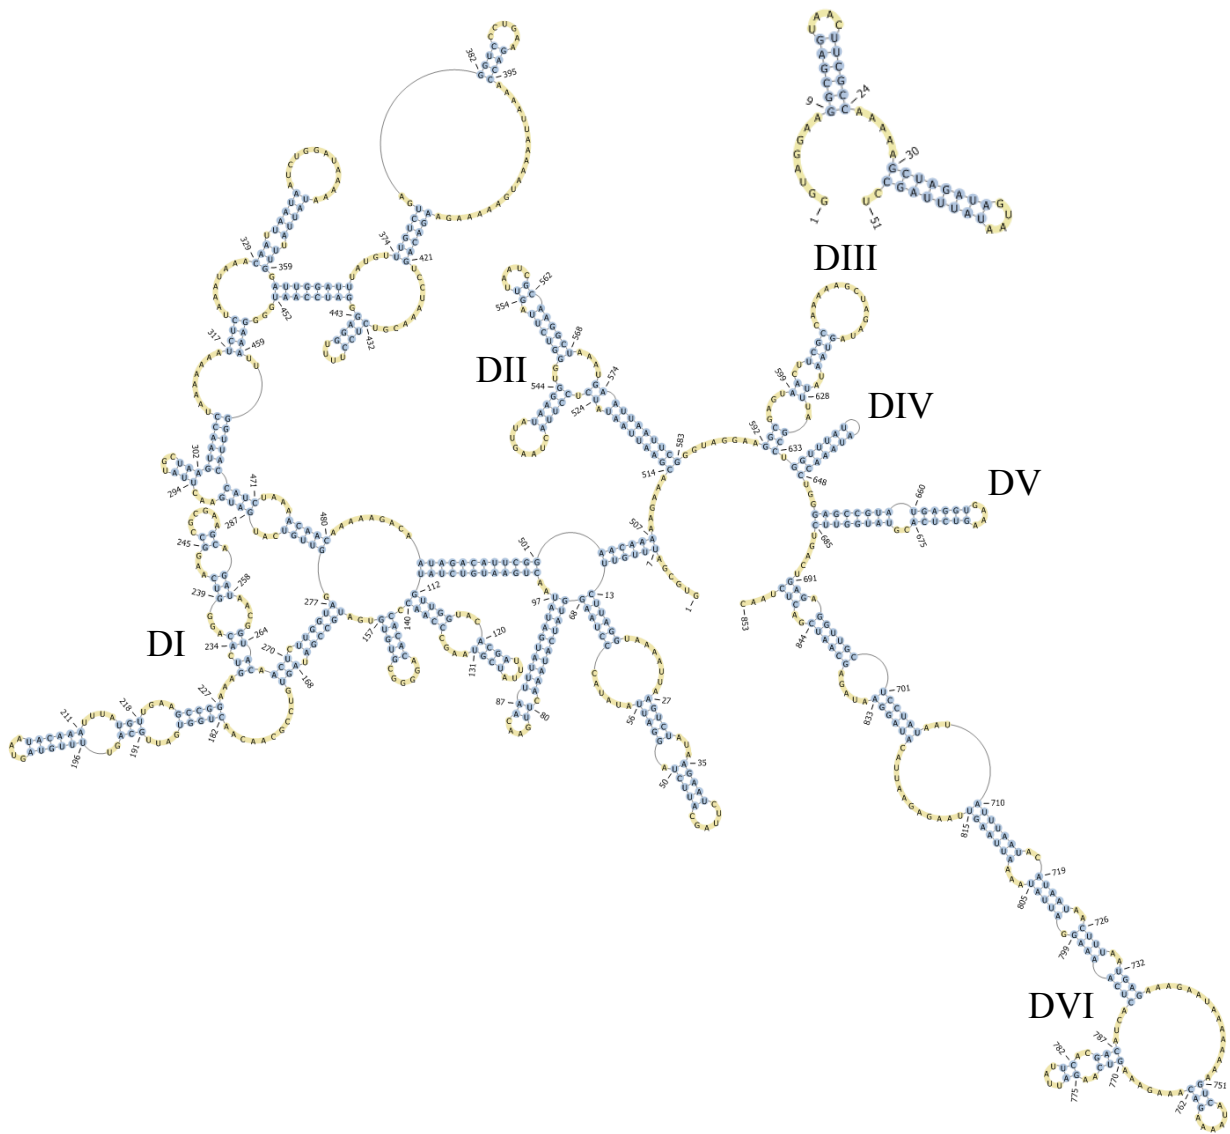

Supplement: peerj-03-1017-s008.pdf [file peerj-03-1017-s008.pdf]
