# Supplementary material for: Recent mobility of plastid encoded group II introns and twintrons in five strains of the unicellular red alga Porphyridium
Source: PeerJ. 2015 Jun 18;3:e1017. doi: 10.7717/peerj.1017 (PMC4476101; doi:10.7717/peerj.1017)
Supplement: Table S1 — Sequences used to guide secondary structure homology search and included in phylogenetic analyses of P. purpureum group II introns. [file peerj-03-1017-s025.xlsx]

## Sheet: Sheet1
Taxon	class	species	strain	localization	host gene	NCBI accession	ORF name	peptide accession	AA len	domains	intron class	intron structure	comments	reference
Rhodophyta	Porphyridiophyceae	Porphyridium purpureum	NIES 2140	Chloroplast	atpE / atpB (no intron)	NC_023133	mat1a	YP_008965684	459	RT-X	CL2	-	no intron - intergene	Tajima 2014
Rhodophyta	Porphyridiophyceae	Porphyridium purpureum	NIES 2140	Chloroplast	dnaK	NC_023133	mat1b	YP_008965705	420	RT-X	?	?		Tajima 2014
Rhodophyta	Porphyridiophyceae	Porphyridium purpureum	NIES 2140	Chloroplast	infC	NC_023133	mat1c	YP_008965718	443	RT-X	CL2	B2		Tajima 2014
Rhodophyta	Porphyridiophyceae	Porphyridium purpureum	NIES 2140	Chloroplast	gltB	NC_023133	mat1d	YP_008965761	538	RT-X-En	CL2	B2		Tajima 2014
Rhodophyta	Porphyridiophyceae	Porphyridium purpureum	NIES 2140	Chloroplast	rpoC2	NC_023133	mat1e	YP_008965806	468	RT-X	CL2	B2		Tajima 2014
Rhodophyta	Porphyridiophyceae	Porphyridium purpureum	SAG 1380-1a	Chloroplast	atpE / atpB (no intron)	KJ826367	mat1a		459	RT-X	CL2	-	no intron - intergene	This study
Rhodophyta	Porphyridiophyceae	Porphyridium purpureum	SAG 1380-1b	Chloroplast	atpE / atpB (no intron)	KJ826368	mat1a		459	RT-X	CL2	-	no intron - intergene	This study
Rhodophyta	Porphyridiophyceae	Porphyridium purpureum	SAG 1380-1d	Chloroplast	atpE / atpB (no intron)	KJ826369	mat1a		459	RT-X	CL2	-	no intron - intergene	This study
Rhodophyta	Porphyridiophyceae	Porphyridium purpureum	CCMP1328	Chloroplast	atpE / atpB (no intron)	KJ826370	mat1a		459	RT-X	CL2	-	no intron - intergene	This study
Rhodophyta	Porphyridiophyceae	Porphyridium purpureum	SAG 1380-1a	Chloroplast	dnaK	KJ826371	mat1b		484	RT-X	CL2	B2		This study
Rhodophyta	Porphyridiophyceae	Porphyridium purpureum	SAG 1380-1b	Chloroplast	dnaK	KJ826372	mat1b		484	RT-X	CL2	B2		This study
Rhodophyta	Porphyridiophyceae	Porphyridium purpureum	SAG 1380-1d	Chloroplast	dnaK	KJ826373	mat1b		484	RT-X	CL2	B2		This study
Rhodophyta	Porphyridiophyceae	Porphyridium purpureum	CCMP1328	Chloroplast	dnaK	KJ826374	mat1b		484	RT-X	CL2	B2		This study
Rhodophyta	Porphyridiophyceae	Porphyridium purpureum	SAG 1380-1a	Chloroplast	infC	KJ826375	mat1c		443	RT-X	CL2	B2		This study
Rhodophyta	Porphyridiophyceae	Porphyridium purpureum	SAG 1380-1b	Chloroplast	infC	KJ826376	mat1c		443	RT-X	CL2	B2		This study
Rhodophyta	Porphyridiophyceae	Porphyridium purpureum	SAG 1380-1d	Chloroplast	infC	KJ826377	mat1c		443	RT-X	CL2	B2		This study
Rhodophyta	Porphyridiophyceae	Porphyridium purpureum	CCMP1328	Chloroplast	infC	KJ826378	mat1c		443	RT-X	CL2	B2		This study
Rhodophyta	Porphyridiophyceae	Porphyridium purpureum	SAG 1380-1a	Chloroplast	rpoC2	KJ826379	mat1e		468	RT-X	CL2	B2		This study
Rhodophyta	Porphyridiophyceae	Porphyridium purpureum	SAG 1380-1b	Chloroplast	rpoC2	KJ826380	mat1e		468	RT-X	CL2	B2		This study
Rhodophyta	Porphyridiophyceae	Porphyridium purpureum	SAG 1380-1d	Chloroplast	rpoC2	KJ826381	mat1e		468	RT-X	CL2	B2		This study
Rhodophyta	Porphyridiophyceae	Porphyridium purpureum	CCMP1328	Chloroplast	rpoC2	KJ826382	mat1e		468	RT-X	CL2	B2		This study
Rhodophyta	Porphyridiophyceae	Porphyridium purpureum	SAG 1380-1a	Chloroplast	rpoC2_intron1	KJ826383	mat1f		538	RT-X-En	CL2	B2	matf1 / twintron	This study
Rhodophyta	Porphyridiophyceae	Porphyridium purpureum	SAG 1380-1b	Chloroplast	rpoC2_intron1	KJ826384	mat1f		538	RT-X-En	CL2	B2	matf1 / twintron	This study
Rhodophyta	Porphyridiophyceae	Porphyridium purpureum	SAG 1380-1d	Chloroplast	rpoC2_intron1	KJ826385								This study
Rhodophyta	Porphyridiophyceae	Porphyridium purpureum	CCMP1328	Chloroplast	rpoC2_intron1	KJ826386	mat1f		538	RT-X-En	CL2	B2	matf1 / twintron	This study
Rhodophyta	Porphyridiophyceae	Porphyridium purpureum	SAG 1380-1a	Chloroplast	atpl_intron1	KJ826387	mat1f		538	RT-X-En	CL2	B2	matf2 / twintron	This study
Rhodophyta	Porphyridiophyceae	Porphyridium purpureum	SAG 1380-1b	Chloroplast	atpl_intron1	KJ826388	mat1f		538	RT-X-En	CL2	B2	matf2 / twintron	This study
Rhodophyta	Porphyridiophyceae	Porphyridium purpureum	SAG 1380-1d	Chloroplast	atpl_intron1	KJ826389								This study
Rhodophyta	Porphyridiophyceae	Porphyridium purpureum	CCMP1328	Chloroplast	atpl_intron1	KJ826390	mat1f		538	RT-X-En	CL2	B2	matf2 / twintron	This study
Rhodophyta	Porphyridiophyceae	Porphyridium purpureum	SAG 1380-1a	Chloroplast	atpB	KJ826391	mat1f		538	RT-X-En	CL2	B2	matf3 / twintron	This study
Rhodophyta	Porphyridiophyceae	Porphyridium purpureum	CCMP1328	Chloroplast	atpB	KJ826392	mat1f		538	RT-X-En	CL2	B2	matf3 / twintron	This study
Rhodophyta	Porphyridiophyceae	Porphyridium purpureum	SAG 1380-1b	Chloroplast	rpoC1	KJ826393	mat1g		538	RT-X-En	CL2	B2		This study
Rhodophyta	Porphyridiophyceae	Porphyridium purpureum	SAG 1380-1d	Chloroplast	ycf46	KJ826394	mat1h		538	RT-X-En	CL2	B2		This study
Rhodophyta	Porphyridiophyceae	Porphyridium purpureum	SAG 1380-1d	Chloroplast	tsf	KJ826395	mat1i		538	RT-X-En	CL2	B2		This study
Rhodophyta	Florideophyceae	Calliarthron tuberculosum		Chloroplast	chlB	NC_021075	ORF456	YP_007878242	456	RT-X	CL2	?		Janouškovec 2013
Rhodophyta	Florideophyceae	Calliarthron tuberculosum		Chloroplast	trnM	NC_021075	ORF360	YP_007878287	396	RT-X	?	?		Janouškovec 2013
Rhodophyta	Florideophyceae	Chondrus crispus		Chloroplast	trnM	NC_020795	Ccr_ORF426	YP_007627445	427	RT-X	?	?		Janouškovec 2013
Rhodophyta	Florideophyceae	Cruoriaceae sp. LC-2010		Chloroplast	trnM	HM765680			438	RT-X	?	?	intron+maturase ghost / ORF ?	This study
Rhodophyta	Florideophyceae	Grateloupia lanceola		Chloroplast	trnM	HM767138			448	RT-X	?	?		Janouškovec 2013
Rhodophyta	Florideophyceae	Grateloupia taiwanensis		Chloroplast	trnM	NC_021618	ORF12	YP_008144913	450	RT-X	?	?		Janouškovec 2013
Rhodophyta	Florideophyceae	Gracilaria tenuistipitata var. liui		Chloroplast	trnM	NC_006137	ORF198 / ORF197	YP_063663 / YP_06664	464	RT-X	?	?	intron+maturase ghost / ORF ?	This study
Rhodophyta	Florideophyceae	Gracilaria salicornia		Chloroplast	trnM	KF861575	mat / CP76_p049	YP_009019671 / YP_009019672	464	RT-X	?	?	intron+maturase ghost / ORF ?	This study
Diatom		Seminavis robusta		Chloroplast	atpB	Not available	ORF582	Not available						Brembu 2014
Cryptophyta		Rhodomonas salina (Pyrenomonas salina)	Maier	Chloroplast	groEL (cpn60)	X81356		X81356 traduction modified (S51490)	514	RT-X			miss prediction ORF (449 pb) ?	Maier 1995 This study
Cryptophyta		Rhodomonas salina	CCMP2045	Chloroplast	groEL	EU305620	IEP	ACA04001	453	RT-X
Cryptophyta		Rhodomonas salina	CCMP1178	Chloroplast	groEL	EU305621	IEP	ACA04003	443	RT-X			miss prediction ORF (420 pb) ?	This study
Cryptophyta		Rhodomonas salina	CCMP1319	Chloroplast	psbN	NC_009573 EF508371	RT	YP_001293613	425	RT-X
Cryptophyta		Hemiselmis andersenii	CCMP644	Chloroplast	chlB	EU233747	reverse transcriptase/maturase	ABY74346	429	RT-X
Euglenozoa		Colacium vesiculosum	CCAP1211/3	Chloroplast	psbC	JN674636	orf215	AEW12971	214					Wiegert-2013
Euglenozoa		Colacium vesiculosum	CCAP1211/3	Chloroplast	psbC	JN674636	orf550	AEW12972	549
Euglenozoa		Colacium vesiculosum	CCAP1211/3	Chloroplast	rps3/rpl16 (no intron)	JN674636	roaA	AEW12923	459
Euglenozoa		Euglena deces	UTEX LB 370	Chloroplast	psbC	Z99833	maturase-like protein / mat1	Group II database Euglena deces psbC.I4	453	RT-X	CL2	B2	miss prediction ORF (455 pb) ?	Doetsch-1998 / Group II database Euglena deces psbC.I4
Euglenozoa		Euglena gracilis	Z / UTEX 753	Chloroplast	psbC	NC_001603 (X70810)	ycf13	NP_041894, P05728	458	RT-X	CL2	B2		Doetsch-1998 / Group II database Euglena gracilis psbC.I4
Euglenozoa		Euglena gracilis	Z / UTEX 753	Chloroplast	psbC	NC_001603 (X70810)	orf635	NP_041893 CAC69146 P31916	634	RT-X				MAT2_EUGGR /
Euglenozoa		Euglena gracilis	Z / UTEX 753	Chloroplast	rps3/rpl16 (no intron)	NC_001603 (X70810)	EugrCp028 / roaA	NP_041917, X70810.2, CAA50104, CAC69147, Z11874, CAA77921, S34525, P30397	516	RT-X
Euglenozoa		Euglena gracilis	Z / UTEX 753	Chloroplast	psbD	NC_001603 (X70810)	EugrCp116	NP_041891	506	RT-X	CL2	B2		Doetsch-1998 / Group II database Euglena gracilis psbD.I8
Euglenozoa		Euglena granulata		Chloroplast	psbC	AJ222582	mat2	CAA10852	707
Euglenozoa		Euglena longa (Asiata longa)	CCAP 1204/17a	Chloroplast	tRNA-Leu / tRNA-Leu (no intron)	NC_002652 (AJ294725)	ycf13	NP_075000, P14761 (MAT1_EUGLO)	455	RT-X	CL2	B2
Euglenozoa		Euglena longa (Asiata longa)	CCAP 1204/17a	Chloroplast	rps3/rpl16 (no intron)	NC_002652 (AJ294725)	AsloCp28 / roaA	NP_074988, CAC24599, P58145	519
Euglenozoa		Euglena myxocylindracea	UTEX 1989	Chloroplast	psbC	Z99835	mat1	Euglena myxocylindracea psbC.I4	437	RT-X	CL2	B2		Doetsch-1998 / Group II database Euglena myxocylindracea psbC.I4
Euglenozoa		Euglena myxocylindracea	?	Chloroplast	?		mat4	AAQ84048	575	RT-X-En
Euglenozoa		Euglena viridis	?	Chloroplast	psbC	AJ222584	mat2	CAA10856	758	RT-X			miss prediction ORF (542 pb) ?	This study
Euglenozoa		Euglena viridis	UTEX 85	Chloroplast	psbC	Z99836	mat1	Euglena viridis psbC.I4	468	RT-X	CL2	B2		Doetsch-1998 / Group II database Euglena viridis psbC.I4
Euglenozoa		Euglena viridis	NJ001	Chloroplast	psbC	NC_020460	maturase-like protein	YP_007516999, AEY70772,	542	RT-X
Euglenozoa		Euglena viridis	NJ001	Chloroplast	psbC	NC_020460	ycf13	YP_007517001	452	RT-X	CL2	B2
Euglenozoa		Euglena viridis	NJ001	Chloroplast	psbC	NC_020460	roaA	YP_007517037	297	RT-?
Euglenozoa		Euglenaformis proxima	SAG 1224-11a	Chloroplast	trnL/rps11 (no intron)	KC684276	maturase-like protein	AGL11975	310
Euglenozoa		Euglenaformis proxima	SAG 1224-11a	Chloroplast	psbD/psbC (no intron)	KC684276	maturase-like protein 2	AGL11985	692
Euglenozoa		Euglenaformis proxima	SAG 1224-11a	Chloroplast		KC684276	ycf13	AGL11987	450
Euglenozoa		Euglenaformis proxima	SAG 1224-11a	Chloroplast		KC684276	roaA	AGL12007	286
Euglenozoa		Euglenaria anabaena	?	Chloroplast	psbC	AJ222581	mat2	CAA10850	759	RT-X
Euglenozoa		Eutreptia viridis	?	Chloroplast	psbC		ORF 564 / maturase 1-like	AEQ94221	563	RT-X-En
Euglenozoa		Eutreptia viridis	?	Chloroplast	psbC		ORF 246 / maturase 1-like	AEQ94222	245
Euglenozoa		Eutreptiella gymnastica	K-0333	Chloroplast	psbD/psbC (no intron)	NC_017754	mat1	YP_006234214	378	RT-X
Euglenozoa		Lepocinclis buetschlii	UTEX LB 523	Chloroplast	psbC	Z99834	mat1	CAB16959	451	RT-X	CL2	B2		Doetsch-1998 / Group II database Leopcinclis buetschlii psbC.I4
Euglenozoa		Lepocinclis spirogyroides		Chloroplast	psbC	AJ222583	mat2	CAA10854	710	RT-X-?
Euglenozoa		Lepocinclis spirogyroides		Chloroplast	psbA	DQ128157	mat5	ABB02360	323	RT-?
Euglenozoa		Monomorphina aenigmatica (Phacus aenigmaticus)	UTEX 1284	Chloroplast	psbC	NC_020018	orf631	YP_007317169, AFZ88772	631	RT-X
Euglenozoa		Monomorphina aenigmatica (Phacus aenigmaticus)	UTEX 1284	Chloroplast	psbC	NC_020018	orf462	YP_007317170, AFZ88770	459	RT-X
Euglenozoa		Monomorphina aenigmatica (Phacus aenigmaticus)	UTEX 1284	Chloroplast	rps3/rpl16 (no intron)	NC_020018	orf240 / roaA	YP_007317208 + YP_007317207, AFZ88809	481	RT-X			miss prediction ORF (542 pb) ?	This study
Euglenozoa		Strombomonas acuminata	S716	Chloroplast	psbC	JN674637	hypothetical protein	AEW12980	462
Euglenozoa		Strombomonas acuminata	S716	Chloroplast	psbC	JN674637	hypothetical protein	AEW12981	456
Euglenozoa		Strombomonas acuminata	S716	Chloroplast	rps3/rpl16 (no intron)	JN674637	roaA	AEW13026	351
Viridiplantae	Chlorophyta	Pycnococcus provasolii		chloroplast	atpB		orf583	YP_002600812	583
Viridiplantae	Chlorophyta	Volvox carteri		chloroplast	atpB		orf608	ACI31231	607
Viridiplantae	Chlorophyta	Volvox carteri f. nagariensis		chloroplast	atpA		orf612	ACY06058	611
Viridiplantae	Streptophyta	Anthotroche blackii		chloroplast	trnK		maturase K	CAE51505	509
Viridiplantae	Streptophyta	Cyphanthera microphylla		chloroplast	trnK		maturase K	CAE51514	509
Viridiplantae	Streptophyta	Duboisia myoporoides		chloroplast	trnK		maturase K	CAE51512	511
Viridiplantae	Streptophyta	Marchantia polymorpha		chloroplast	trnK	X04465	ORF370i	CAA280076	370
Viridiplantae	Streptophyta	Nicotiana tabacum		chloroplast	trnK	NC_001879	matK	NP_054478	509
