# Supplementary material for: Recent mobility of plastid encoded group II introns and twintrons in five strains of the unicellular red alga Porphyridium
Source: PeerJ. 2015 Jun 18;3:e1017. doi: 10.7717/peerj.1017 (PMC4476101; doi:10.7717/peerj.1017)
Supplement: Table S2 — Query sequences used to identify the DI, DIV, DV and DVI domains via BLASTn (Altschul et al., 1990). [file peerj-03-1017-s026.xlsx]

## Sheet: Sheet1
Location	Query sequence
Ascending DI	GTGCGATTTGTTCTTAGGT
Descending DIV / ascending DV	GTAAATCTGGGAGCCG
Descending DVI	CUCGAUCUAAACAUAGA
